# Supplementary material for: Patients with Asian-type DEL can safely be transfused with RhD-positive blood
Source: PubMed Central journal article supplement — Blood. 2023 Jan 15;141(17):2141–50. doi: 10.1182/blood.2022018152 (PMC10273079; doi:10.1182/blood.2022018152), 2023-01-15
Supplement: BLOOD_BLD-2022-018152-mmc1.pdf [file BLOOD_BLD-2022-018152-mmc1.pdf]

## **Supplementary Information**

**Patients with Asian-type DEL can safely be transfused using RhD-positive blood**

## SUPPLEMENTARY MATERIALS

### CONTENTS:

#### SUPPLEMENTARY METHODS

|                                                                                                                             |       |
|-----------------------------------------------------------------------------------------------------------------------------|-------|
| 1. Routine serological typing for Asian-type DEL .....                                                                      | 3     |
| 2. Establishment of a high-resolution melting (HRM) method for routine detection of Asian-type DEL allele .....             | 3     |
| 3. Inclusion and exclusion criteria for participants of clinical trial.....                                                 | 4     |
| 4. PCR amplification and Sanger sequencing analysis of <i>RHD</i> transcripts covering the c.1227A variant and exon 9 ..... | 4     |
| 5. Nanopore sequencing analysis of full-length <i>RHD</i> transcripts .....                                                 | 4     |
| 6. Expression of major <i>RHD</i> variant transcripts <i>in vitro</i> .....                                                 | 4 - 5 |

#### SUPPLEMENTARY FIGURES

|                                                                                                                                                                               |         |
|-------------------------------------------------------------------------------------------------------------------------------------------------------------------------------|---------|
| Figure S1. Representative HRM graphs for Asian-type DEL genotyping .....                                                                                                      | 6       |
| Figure S2. Sanger sequencing of <i>RHD</i> transcript fragment carrying exon 9 and the c.1227A variant in Asian-type DEL individuals .....                                    | 7       |
| Figure S3. The raw sequence of full-length <i>RHD</i> transcript obtained in Asian-type DEL individuals by Nanopore sequencing.....                                           | 8       |
| Figure S4. Alignment to the different reference <i>RHD</i> transcripts in Nanopore sequencing .....                                                                           | 9       |
| Figure S5. The A/G ratio analysis of <i>RHD</i> c.1227G>A variant of full-length transcript in Nanopore .....                                                                 | 10      |
| Fig S6. Sequencing read length of Nanopore sequencing .....                                                                                                                   | 11      |
| Fig S7. Sequencing accuracy rate of Nanopore sequencing .....                                                                                                                 | 12      |
| Figure S8. Comparison of the nucleotide and deduced amino acids sequences of the major types of <i>RHD</i> variant transcripts identified in Asian-type DEL individuals ..... | 13 - 19 |

#### SUPPLEMENTARY TABLES

|                                                                                                                                                           |         |
|-----------------------------------------------------------------------------------------------------------------------------------------------------------|---------|
| Table S1. <i>RHD</i> genotyping results for the pregnant women and patients with DEL phenotype .....                                                      | 20      |
| Table S2. Alloantibodies against RBCs antigens detected in the patients and pregnant women with true D– and Asian-type DEL phenotypes .....               | 21 - 22 |
| Table S3. Detailed information, blood group typing, and follow-up antibody testing of 54 Asian-type DEL recipients who received D+ RBCs transfusion ..... | 23 - 31 |
| Table S4. The total reads and mapping rate of Nanopore sequencing to <i>RHD</i> transcripts in eight Asian-type DEL individuals and one D+ control .....  | 32      |

|                                       |           |
|---------------------------------------|-----------|
| <b>SUPPLEMENTARY REFERENCES</b> ..... | <b>33</b> |
|---------------------------------------|-----------|

## SUPPLEMENTARY METHODS

### 1. Routine serological typing for Asian-type DEL

In this study, RhD antigen was first typed using two anti-D reagents (Clone Rum-1, IgM, Shanghai Hemo-Pharmaceutical & Biological Co., LTD, China; Clone TH-28/MS-26, IgM/IgG, Millipore, UK). For samples with a serologically apparent D- phenotype after excluding weak D and partial D, DEL phenotyping was diagnosed by adsorption/elution testing as described previously<sup>1,2</sup> using two anti-D mAbs (HM16, IgG, Diagast, France; MS26, IgG, Shanghai Hemo-Pharmaceutical & Biological, China). For each assay, blood samples from Asian-type DEL and true D- donors were used as positive and negative controls, respectively.

### 2. Establishment of a high-resolution melting (HRM) method for routine detection of Asian-type DEL allele

For the laboratory test for Asian-type DEL, the detection of the *RHD*\*1227A allele is necessary because the usual serological adsorption/elution test is a time-consuming manual operation and cannot distinguish Asian-type DEL from other types of DELs with different genetic backgrounds. Moreover, traditional genotyping methods (such as PCR-SSP<sup>3</sup>) are time-consuming and not convenient for routine testing of the Asian-type DEL allele. Therefore, we developed a high-resolution melting (HRM) method to detect the region of exon 9 of the *RHD* gene covering the specific synonymous mutation (c.1227G>A, p. Lys409Lys) responsible for the most common Asian-type DEL phenotype. The region of exon 9 of the *RHD* gene harboring the mutation was amplified. A pair of *RHD*-specific primers (*RHD*-F: ATATGGAAAGCACCTCATGA; *RHD*-R: AAACAGCAAGTCAACATATATACT encompassing 139 bp; NC\_000001.11) was designed and synthesized. A 20- $\mu$ L PCR mixture consisted of 30 ng of genomic DNA, 3 mM MgCl<sub>2</sub>, 10  $\mu$ L 2 $\times$ LightCycler<sup>®</sup> 480 High Resolution melting master mixture (Roche Diagnostics GmbH, Mannheim, Germany), 0.3  $\mu$ M forward and reverse primers and 6 ng of spiking DNA from D+ controls with the normal *DD* genotype. PCR was carried out for 10 sec at 95°C, followed by 45 cycles of denaturation at 95°C for 10 sec, annealing at 60°C for 15 sec, and extension at 72°C for 10 sec; an HRM step at 95°C for 1 min and temperature reduction to 40°C for 1 min was performed, followed by continuous acquisition at 25 times per degree. The HRM experiment was continuously performed in a closed tube using a LightCycler<sup>®</sup> 480 II (Roche Diagnostics International Ltd, Rotkreuz, Switzerland), and data analysis was conducted using LightCycler 480 software v1.5.1.62 (Roche Diagnostics International Ltd).

The well-defined reference Asian-type DEL samples with the Asian-type DEL phenotype and different known genotypes carrying the *RHD*\*01EL.01 (*RHD*\*1227A) allele (homozygous *RHD*\*1227A/1227A genotype (n = 3), heterozygous *RHD*\*1227A/1227G genotype (n = 1), *RHD*\*1227A/01N.01 genotype (n = 10)) and wild-type samples with *RHD*\*1227G/1227G genotype were used to develop and validate the HRM method. The Asian-type DEL phenotype of reference samples was detected by the serological adsorption/elution method. The *RHD* genotypes of reference samples were determined by using the proven *RH*-multiplex ligation-dependent probe amplification (*RH*-MLPA) assay and sequencing of *RHD* exon 9 as described previously<sup>4,5</sup>. In each test, the DNA samples of Asian-type DEL individuals with three different genotypes and individuals with the wild-type *RHD* genotype were tested in parallel with unknown samples for HRM genotyping as controls. Two hundred *RHD*\*1227A allele carriers detected by HRM were sequenced for *RHD* exon 9 by Sanger sequencing to validate the HRM method.

As a result, the reference samples were classified into four groups with different melting curves (**Fig. S1**). When the HRM melting curves of tested samples were classified into the melting curves of Asian-type DEL reference samples with three different genotypes, the *RHD*\*1227A allele was detected. If a tested sample was shown to have a different melting curve compared with Asian-type DEL reference samples, the exon 9 of the *RHD* gene was amplified and sequenced to clarify the variants except for the c.1227A. The 200 *RHD*\*1227A allele carriers identified by HRM were confirmed to have the c.1227A variant by Sanger sequencing.

In summary, HRM is a simple, rapid, inexpensive, and reliable method for routine testing of the Asian-type DEL allele. Thirty samples with triplicate can be run in a 96-well plate within two and a half hours, including less than one hour of genomic DNA extraction and pipetting steps.

### 3. Inclusion and exclusion criteria for participants of clinical trial

Inclusion criteria for eligible participants were as follows: (1) Asian-type DEL blood group; (2) male patients, or female patients  $\geq$  49 years of age, or female with severe illness and no plan for further pregnancy; (3) needing blood transfusion in line with guidelines for internal medicine or surgery; and (4) signed voluntary informed consent for blood transfusion treatment before the trial.

The exclusion criteria were: (1) adverse reaction in a previous transfusion; (2) allergies to blood products or immunodeficiency diseases; (3) needing massive blood transfusion for acute blood loss; (4) positive pregnancy test results; (5) conscious dysfunction or severe mental illness; and (6) unsuitability for the study, as estimated by the principal investigators.

The main recruitment strategy was to inform the participants the benefit of the trial. D+ blood supply for Asian-type DEL patients, can be guaranteed, as opposed to rare D- blood, which is often in short supply in China, and many Asian countries.

### 4. PCR amplification and Sanger sequencing analysis of *RHD* transcripts covering c.1227A variant and exon 9

The region of *RHD* exon 9 to the 3'-UTR was amplified using primers (forward: 5'-CTGACAGGTTTGCTCCTAAATCTT-3'; reverse: 5'-CTCTGACTCCAGTGCCTGCGCG-3'<sup>6</sup>) with GoTaq Colorless Master Mix (Promega, Madison, USA). The PCR conditions were: 5 minutes at 94°C; 40 cycles of 30 seconds at 94°C, 30 seconds at 58°C, 30 seconds at 72°C; final extension at 72°C for 5 minutes. The PCR product was sequenced by the Sanger method, and the sequences were analyzed with the SeqManII program of the Lasergene package (DNASTAR Inc., Madison, WI, USA).

### 5. Nanopore sequencing analysis of full-length *RHD* transcripts

The whole coding region of *RHD* cDNA was amplified using primers<sup>6</sup> (Forward *RHD* 5'-UTR: 5'-CTGCACAGAGACGGACACAG-3'; Reverse 3'-UTR: 5'-CTCTGACTCCAGTGCCTGCGCG -3') (Fig. 3A) and LongAmp Taq 2X Master Mix (New England Biolabs). The PCR conditions were: 30 seconds at 95°C; 15-25 cycles of 15 seconds at 95°C, 30 seconds at 57°C, 1 minute and 20 seconds at 65°C; final extension at 65°C for 5 minutes. The PCR products were then subjected to library preparation for Nanopore sequencing (Oxford Nanopore Technologies, Oxford, England). Briefly, all PCR products were cleaned with AMPure XP beads (Beckman Coulter Inc., Brea, CA, USA). DNA end-repair was performed using NEBNext Ultra II End Repair/dA-Tailing Module (New England Biolabs), followed by purification with AMPure XP beads and ligation of barcodes with Native Barcoding Expansion 1-12 (EXP-NBD104, Oxford Nanopore Technologies, Oxford, England) and Blunt/TA Ligase Master Mix (New England Biolabs). DNA sequencing Adapter Mix (Oxford Nanopore Technologies, Oxford, England) was ligated to the libraries with NEBNext Quick Ligation Module (New England Biolabs). The libraries were incubated with AMPure XP beads and washed twice with Short Fragment Buffer (EXP-SFB001, Oxford Nanopore Technologies, Oxford, England). Finally, the libraries were sequenced with the R10.3 Oxford nanopore flow cell using the SQK-LSK109 method and a MinION or MinION Mk1C sequencer (Oxford Nanopore Technologies, Oxford, England). Base calling of raw Nanopore sequencing data was performed using Guppy v 4.4.2 (--barcode\_kits "EXP-NBD114" -c dna\_r10.3\_450\_bps\_hac.cfg --chunk\_size 4000 --chunks\_per\_runner 1000 --device). The reads were mapped to the human genome (GRCh37.75) by minimap2 v2.18<sup>7</sup>. The aligned read bam files were indexed and visually inspected using Integrative Genomics Viewer. *RHD* transcripts were identified, quantified, and analyzed using FLAIR v1.5 (Full-Length Alternative Isoform analysis of RNA)<sup>8</sup>.

### 6. Expression of major *RHD* variant transcripts *in vitro*

Wildtype (wt) pHeftig-*RHD* (*RHD*\*1227G) and pSINK-*RHAG*, carrying the complete coding sequences of wt *RHD* (NM\_016124.6) and wt *RHAG* (NM\_000324.3), respectively, were kindly provided by Prof. C. Ellen van der Schoot (University of Amsterdam, the Netherlands). The seven most common *RHD* spliced transcripts, including exon 9 deletion, exon 8/9 deletion, exon 7/9 deletion, exon 7/8/9 deletion, exon 9 deletion with insertion of 170 bp of intron 7, exon 8/9 deletion with insertion of 170 bp of intron 7, and the full-length *RHD* transcript carrying the c.1227A variant, were synthesized and cloned into the pHeftig vector by Sangon Biotech

(Shanghai, China). HEK 293T cells, which do not express endogenous RhAG and RhD, were transiently transfected with *RHD* constructs individually with the wt *RHAG* construct. Forty-eight hours after transfection, surface expression of RhD antigens was analyzed using a panel of seven anti-D mAbs for the systematic detection of D epitopes (Clone P3×249, P3×290, and HM16, Diagast, France; MS26, Shanghai Hemo-Pharmaceutical & Biological, China; LHM169/81, LHM76/58, and LHM76/59, kindly provided by Prof. C. Ellen van der Schoot, University of Amsterdam, the Netherlands) by flow cytometry. An Alexa Fluor 647 goat anti-human IgG (H + L) antibody (1:50 dilution, Life Tech, Eugene, OR) was used as the secondary antibody. Data acquisition and analysis were performed with a BD FACSCanto II flow cytometer and FlowJo v.7.6 software, respectively.

## SUPPLEMENTARY FIGURES

Figure S1

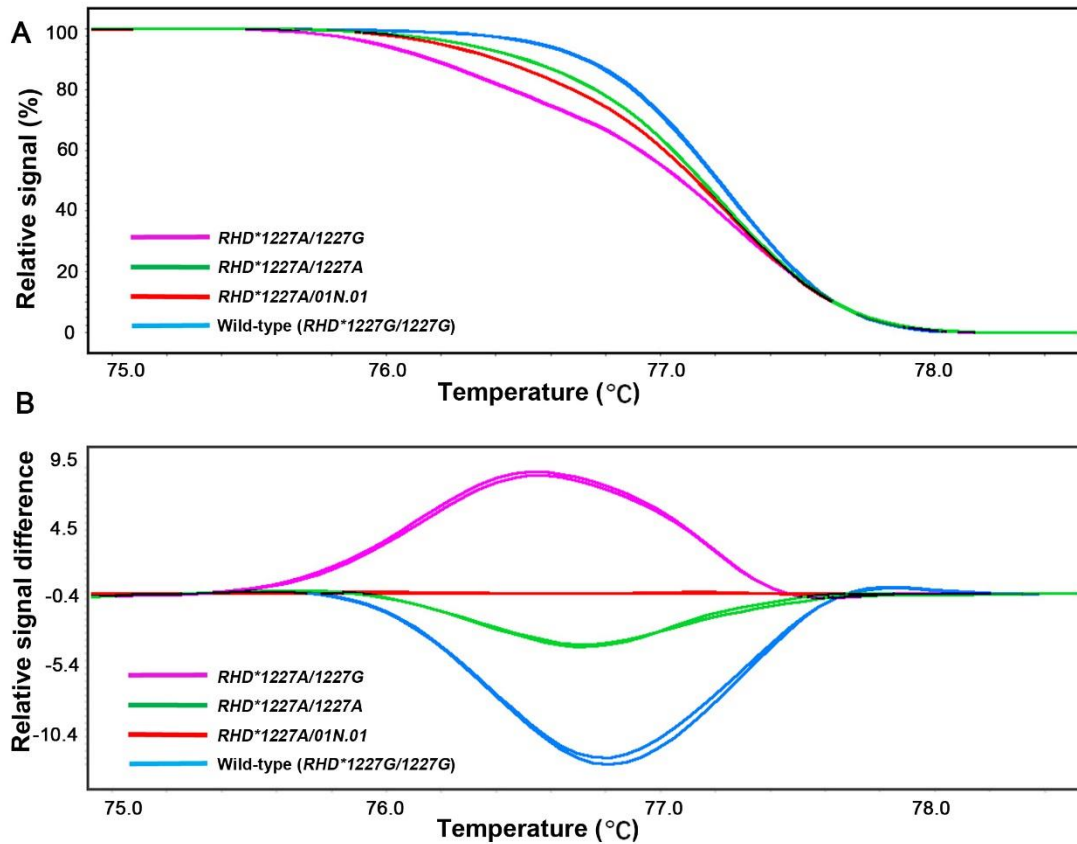

**Figure S1. High-resolution melting curve analysis for Asian-type DEL samples**

Three Asian-type DEL samples carrying the *RHD\*01EL.01* (*RHD\*1227A*) allele (homozygous *RHD\*1227A/1227A*, heterozygous *RHD\*1227A/1227G* and *RHD\*1227A/RHD\*01N.01*) and a wild-type (*RHD\*1227G/1227G*) sample were used. The differential melting properties of representative samples are shown using (A) normalized and temperature-shifted melting curves and (B) normalized and temperature-shifted difference plots. For each sample, two technical replicates were analyzed.

Figure S2

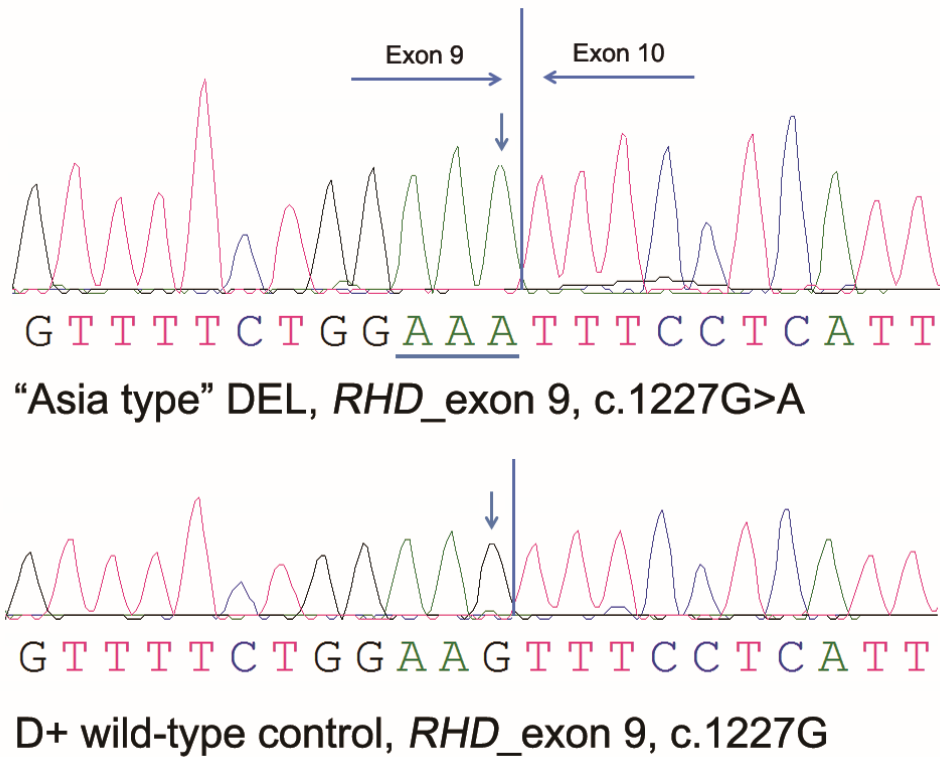

**Figure S2. Sanger sequencing of *RHD* transcript fragment carrying exon 9 and the c.1227A variant in Asian-type DEL individuals**

The mRNA was extracted from the cultured erythroblast of Asian-type DEL individuals and D+ controls. cDNA fragments spanning exon 9 to 3'UTR were amplified and sequenced.

### Figure S3

> Homo sapiens Rh blood group D antigen (RHD), transcript covering the whole coding region and a c.1227A variant

```
TTGGCCAAGATCTGACCGTGATGGCGGCCATTGGCTTGGGCTTCCTCACCTCGAGTTTCCGGAGACACA  
GCTGGAGCAGTGTGGCCTTCAACCTCTTCATGCTGGCGCTTGGTGTGCAGTGGGCAATCCTGCTGGACG  
GCTTCTGAGCCAGTTCCTTCTGGGAAGGTGGTCATCACACTGTTTCAGTATTCGGCTGGCCACCATGA  
GTGCTTTGTTCGGTGCTGATCTCAGTGGATGCTGTCTTGGGGAAGGTCAACTTGGCGCAGTTGGTGGTGA  
TGGTGTGGTGGAGGTGACAGCTTTAGGCAACCTGAGGATGGTCATCAGTAATATCTTCAACACAGACT  
ACCACATGAACATGATGCACATCTACGTGTTTCGCAGCCTATTTTGGGCTGTCTGTGGCCTGGTGCCTGC  
CAAAGCCTCTACCCGAGGGAACGGAGGATAAAGATCAGACAGCAACGATACCCAGTTTGTCTGCCATGC  
TGGGCGCCCTCTTCTTGTGGATGTTCTGGCCAAGTTTCAACTCTGCTCTGCTGAGAAGTCCAATCGAAA  
GGAAGAATGCCGTGTTCAACACCTACTATGCTGTAGCAGTCAGCGTGGTGACAGCCATCTCAGGGTCAT  
CCTTGGCTCACCCCCAAGGGAAGATCAGCAAGACTTATGTGCACAGTGCGGTGTTGGCAGGAGGCGTGG  
CTGTGGGTACCTCGTGTACCTGATCCCTTCTCCGTGGCTTGCCATGGTGTGGGTCTTGTGGCTGGGC  
TGATCTCCGTTCGGGGGAGCCAAGTACCTGCCGGGGTGTGTAACCGAGTGTGGGGATTCCCCACAGCT  
CCATCATGGGCTACAACCTCAGCTTGGTCTGCTTGGAGAGATCATCTACATTGTGCTGCTGGTGC  
TTGATACCGTTCGGAGCCGGCAATGGCATGATTGGCTTCCAGGTCCCTCAGCATTGGGGAACCTCAGCT  
TGGCCATCGTGATAGCTCTCACGTCTGGTCTCCTGACAGGTTTGTCTAAATCTTAAAATATGGAAAG  
CACCTCATGAGGCTAAATATTTTGTGACCAAGTTTCTGGAAATTTCCCTCATTTGGCTGTTGGATTTT  
AAGCAAAAAGCATCCAAGAAAAACAAGGCCGTTCAAAAACAAGACAACCTTCCTCTCACTGTTGCCTGCA  
TTTGTACGTGAGAAAACGCTCATGACAGCAAAGTCTCCAATGTTTCGCGCAGGCACCTGGAGTCAGAG
```

**Figure S3. The raw sequence of full-length *RHD* transcript obtained in Asian-type DEL individuals by Nanopore sequencing**



**Figure S4**

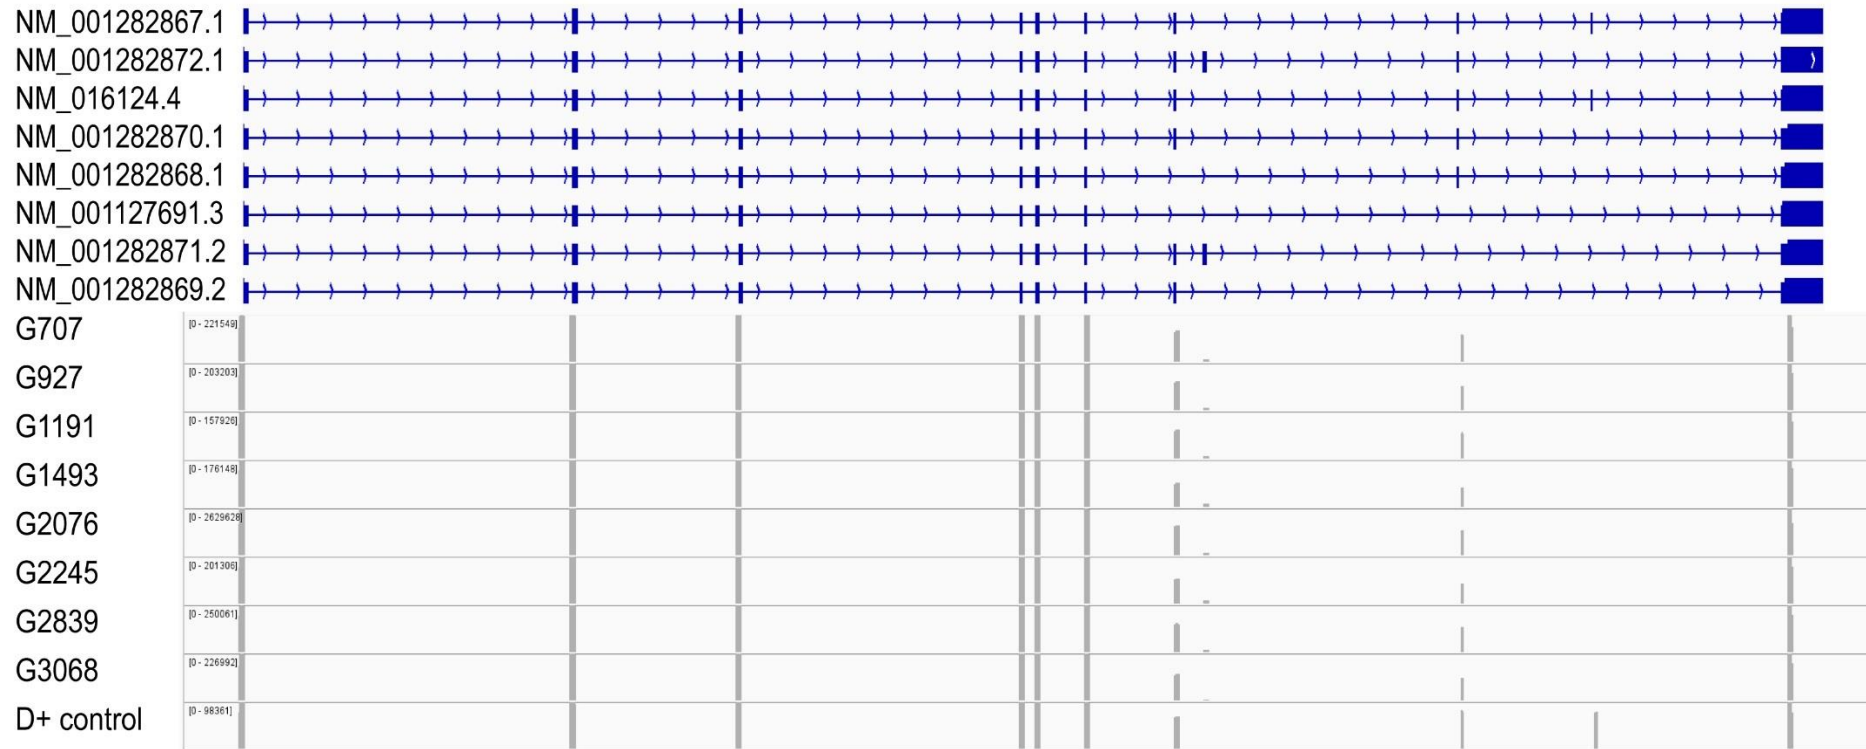

**Fig S4. Alignment to the different reference *RHD* transcripts in Nanopore sequencing**

Figure S5

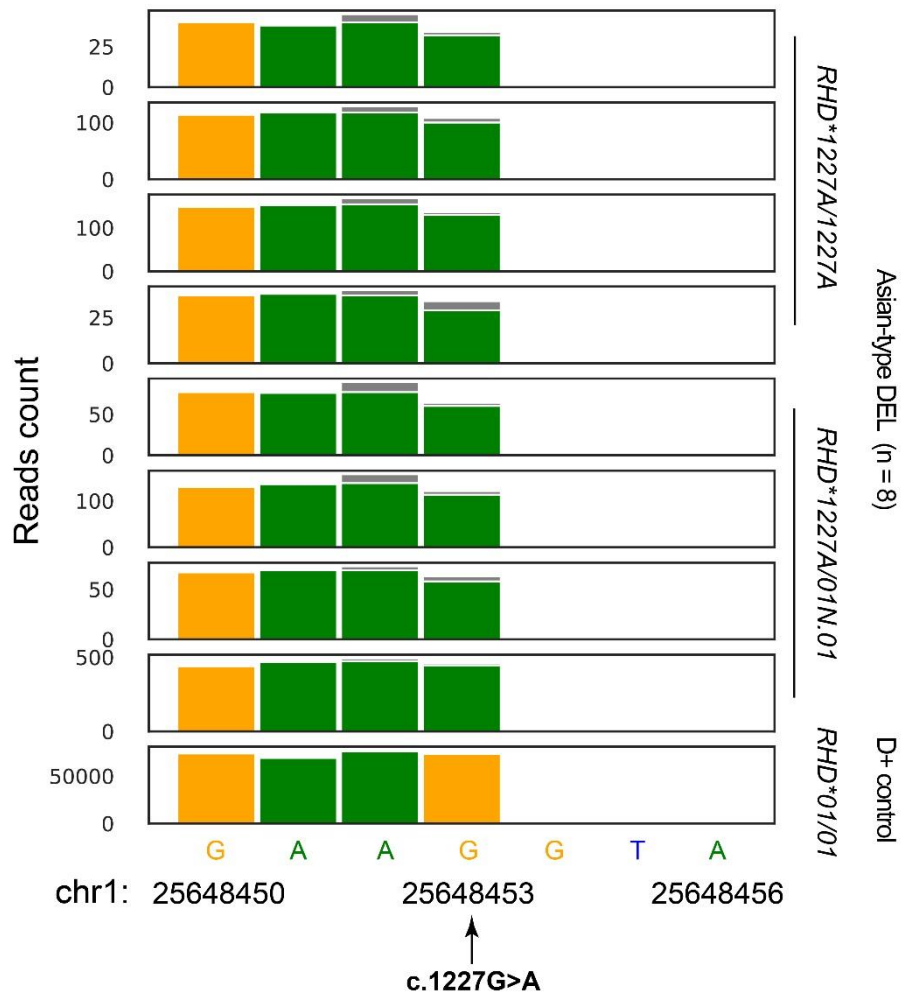

Figure S5. The A/G ratio of *RHD* c.1227G>A variant of full-length transcript detected by Nanopore sequencing

G nucleotide is shown in yellow, and A nucleotide is shown in green. Other nucleotides except for G or A are shown in grey.

Figure S6

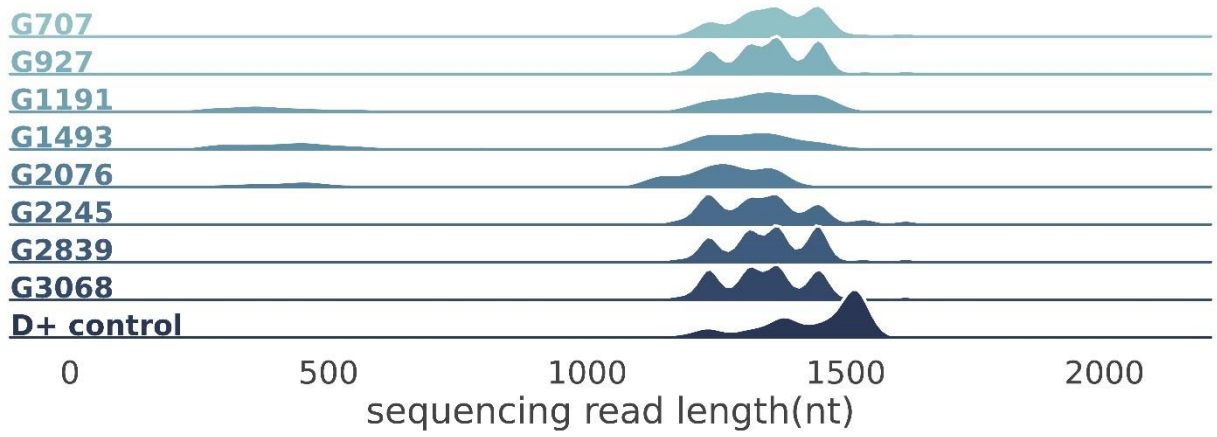

Fig S6. Sequencing read length of Nanopore sequencing

Figure S7

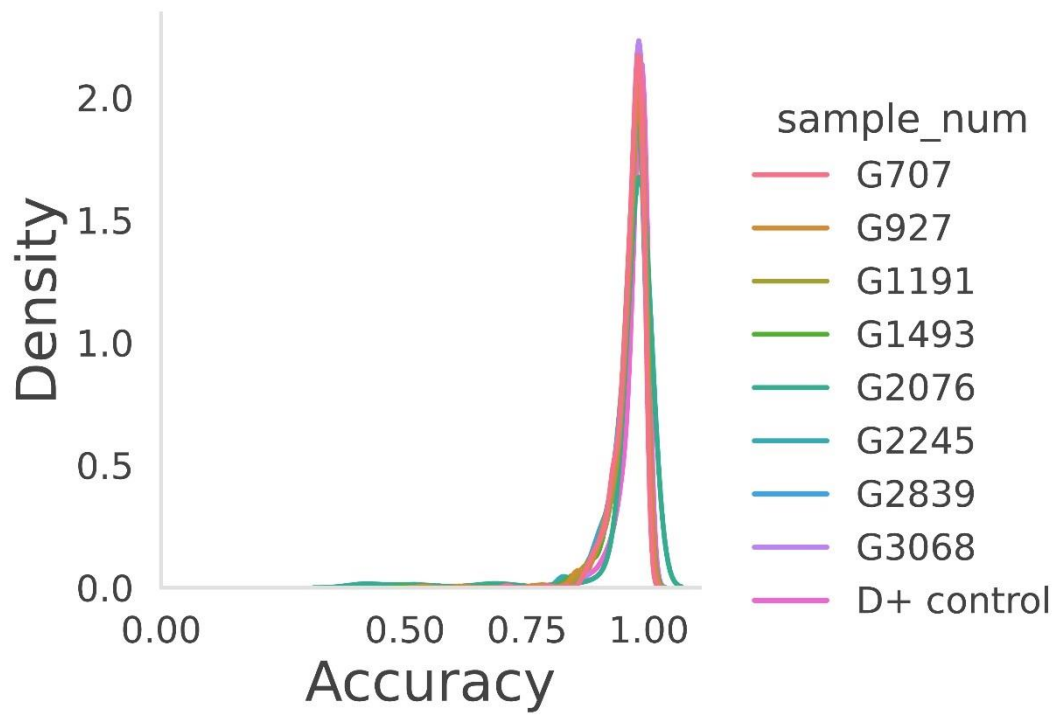

**Fig S7. sequencing accuracy rate of Nanopore sequencing**

With continuous technology development, the error rate of Nanopore sequencing raw reads is at 5% achieving 95% accuracy.

Figure S8

|                                 |            |     |     |     |     |     |     |     |     |     |     |     |     |     |     |     |     |     |     |     |       |
|---------------------------------|------------|-----|-----|-----|-----|-----|-----|-----|-----|-----|-----|-----|-----|-----|-----|-----|-----|-----|-----|-----|-------|
| <i>RHD</i> wildtype (NM_016124) | exon 1 - 5 | act | tat | gtg | cac | agt | gcg | gtg | ttg | gca | gga | ggc | gtg | gct | gtg | ggt | acc | tcg | tgt | cac | 858bp |
| RhD wildtype (NP_057208)        |            | T   | Y   | V   | H   | S   | A   | V   | L   | A   | G   | G   | V   | A   | V   | G   | T   | S   | C   | H   | 286aa |
| <i>RHD*1227A</i>                | exon 1 - 5 | act | tat | gtg | cac | agt | gcg | gtg | ttg | gca | gga | ggc | gtg | gct | gtg | ggt | acc | tcg | tgt | cac | 858bp |
|                                 |            | T   | Y   | V   | H   | S   | A   | V   | L   | A   | G   | G   | V   | A   | V   | G   | T   | S   | C   | H   | 286aa |
| exon 7/8/9 del                  | exon 1 - 5 | act | tat | gtg | cac | agt | gcg | gtg | ttg | gca | gga | ggc | gtg | gct | gtg | ggt | acc | tcg | tgt | cac | 858bp |
|                                 |            | T   | Y   | V   | H   | S   | A   | V   | L   | A   | G   | G   | V   | A   | V   | G   | T   | S   | C   | H   | 286aa |
| exon 8/9 del                    | exon 1 - 5 | act | tat | gtg | cac | agt | gcg | gtg | ttg | gca | gga | ggc | gtg | gct | gtg | ggt | acc | tcg | tgt | cac | 858bp |
|                                 |            | T   | Y   | V   | H   | S   | A   | V   | L   | A   | G   | G   | V   | A   | V   | G   | T   | S   | C   | H   | 286aa |
| exon 7/9 del                    | exon 1 - 5 | act | tat | gtg | cac | agt | gcg | gtg | ttg | gca | gga | ggc | gtg | gct | gtg | ggt | acc | tcg | tgt | cac | 858bp |
|                                 |            | T   | Y   | V   | H   | S   | A   | V   | L   | A   | G   | G   | V   | A   | V   | G   | T   | S   | C   | H   | 286aa |
| exon 9 del                      | exon 1 - 5 | act | tat | gtg | cac | agt | gcg | gtg | ttg | gca | gga | ggc | gtg | gct | gtg | ggt | acc | tcg | tgt | cac | 858bp |
|                                 |            | T   | Y   | V   | H   | S   | A   | V   | L   | A   | G   | G   | V   | A   | V   | G   | T   | S   | C   | H   | 286aa |
| exon 8/9 del+170bp IVS7         | exon 1 - 5 | act | tat | gtg | cac | agt | gcg | gtg | ttg | gca | gga | ggc | gtg | gct | gtg | ggt | acc | tcg | tgt | cac | 858bp |
|                                 |            | T   | Y   | V   | H   | S   | A   | V   | L   | A   | G   | G   | V   | A   | V   | G   | T   | S   | C   | H   | 286aa |
| exon 9 del+170 bp IVS7          | exon 1 - 5 | act | tat | gtg | cac | agt | gcg | gtg | ttg | gca | gga | ggc | gtg | gct | gtg | ggt | acc | tcg | tgt | cac | 858bp |
|                                 |            | T   | Y   | V   | H   | S   | A   | V   | L   | A   | G   | G   | V   | A   | V   | G   | T   | S   | C   | H   | 286aa |
|                                 |            |     |     |     |     |     |     |     |     |     |     |     |     |     |     |     |     |     |     |     |       |
|                                 |            |     |     |     |     |     |     |     |     |     |     |     |     |     |     |     |     |     |     |     |       |
|                                 |            |     |     |     |     |     |     |     |     |     |     |     |     |     |     |     |     |     |     |     |       |
|                                 |            |     |     |     |     |     |     |     |     |     |     |     |     |     |     |     |     |     |     |     |       |

← **RHD exon 6** →

|                                 |     |     |     |     |     |     |     |     |     |     |     |     |     |     |     |     |     |     |     |     |     |     |       |
|---------------------------------|-----|-----|-----|-----|-----|-----|-----|-----|-----|-----|-----|-----|-----|-----|-----|-----|-----|-----|-----|-----|-----|-----|-------|
| <i>RHD</i> wildtype (NM_016124) | ctg | atc | cct | tct | ccg | tgg | ctt | gcc | atg | gtg | ctg | ggt | ctt | gtg | gct | ggg | ctg | atc | tcc | gtc | ggg | gga | 924bp |
| RhD wildtype (NP_057208)        | L   | I   | P   | S   | P   | W   | L   | A   | M   | V   | L   | G   | L   | V   | A   | G   | L   | I   | S   | V   | G   | G   | 308aa |
| <i>RHD*1227A</i>                | ctg | atc | cct | tct | ccg | tgg | ctt | gcc | atg | gtg | ctg | ggt | ctt | gtg | gct | ggg | ctg | atc | tcc | gtc | ggg | gga | 924bp |
|                                 | L   | I   | P   | S   | P   | W   | L   | A   | M   | V   | L   | G   | L   | V   | A   | G   | L   | I   | S   | V   | G   | G   | 308aa |
| exon 7/8/9 del                  | ctg | atc | cct | tct | ccg | tgg | ctt | gcc | atg | gtg | ctg | ggt | ctt | gtg | gct | ggg | ctg | atc | tcc | gtc | ggg | gga | 924bp |
|                                 | L   | I   | P   | S   | P   | W   | L   | A   | M   | V   | L   | G   | L   | V   | A   | G   | L   | I   | S   | V   | G   | G   | 308aa |
| exon 8/9 del                    | ctg | atc | cct | tct | ccg | tgg | ctt | gcc | atg | gtg | ctg | ggt | ctt | gtg | gct | ggg | ctg | atc | tcc | gtc | ggg | gga | 924bp |
|                                 | L   | I   | P   | S   | P   | W   | L   | A   | M   | V   | L   | G   | L   | V   | A   | G   | L   | I   | S   | V   | G   | G   | 308aa |
| exon 7/9 del                    | ctg | atc | cct | tct | ccg | tgg | ctt | gcc | atg | gtg | ctg | ggt | ctt | gtg | gct | ggg | ctg | atc | tcc | gtc | ggg | gga | 924bp |
|                                 | L   | I   | P   | S   | P   | W   | L   | A   | M   | V   | L   | G   | L   | V   | A   | G   | L   | I   | S   | V   | G   | G   | 308aa |
| exon 9 del                      | ctg | atc | cct | tct | ccg | tgg | ctt | gcc | atg | gtg | ctg | ggt | ctt | gtg | gct | ggg | ctg | atc | tcc | gtc | ggg | gga | 924bp |
|                                 | L   | I   | P   | S   | P   | W   | L   | A   | M   | V   | L   | G   | L   | V   | A   | G   | L   | I   | S   | V   | G   | G   | 308aa |
| exon 8/9 del+170bp IVS7         | ctg | atc | cct | tct | ccg | tgg | ctt | gcc | atg | gtg | ctg | ggt | ctt | gtg | gct | ggg | ctg | atc | tcc | gtc | ggg | gga | 924bp |
|                                 | L   | I   | P   | S   | P   | W   | L   | A   | M   | V   | L   | G   | L   | V   | A   | G   | L   | I   | S   | V   | G   | G   | 308aa |
| exon 9 del+170 bp IVS7          | ctg | atc | cct | tct | ccg | tgg | ctt | gcc | atg | gtg | ctg | ggt | ctt | gtg | gct | ggg | ctg | atc | tcc | gtc | ggg | gga | 924bp |
|                                 | L   | I   | P   | S   | P   | W   | L   | A   | M   | V   | L   | G   | L   | V   | A   | G   | L   | I   | S   | V   | G   | G   | 308aa |

|                                 |                     |                                                                     |     |                   |   |
|---------------------------------|---------------------|---------------------------------------------------------------------|-----|-------------------|---|
|                                 | ←                   | <b>RHD exon 6</b>                                                   | →   |                   |   |
| <i>RHD</i> wildtype (NM_016124) | gcc aag tac ctg ccg | ggg tgt tgt aac cga gtg ctg ggg att ccc cac agc tcc atc atg ggc tac |     | 990bp             |   |
| RhD wildtype (NP_057208)        | A K Y L P           | G C C N R V L G I P H S S I M G Y                                   |     | 330aa             |   |
| <i>RHD*1227A</i>                | gcc aag tac ctg ccg | ggg tgt tgt aac cga gtg ctg ggg att ccc cac agc tcc atc atg ggc tac |     | 990bp             |   |
|                                 | A K Y L P           | G C C N R V L G I P H S S I M G Y                                   |     | 330aa             |   |
| exon 7/8/9 del                  | gcc aag tac ctg ccg |                                                                     |     | 939bp             |   |
|                                 | A K Y L P           |                                                                     |     | 313aa             |   |
| exon 8/9 del                    | gcc aag tac ctg ccg | ggg tgt tgt aac cga gtg ctg ggg att ccc cac agc tcc atc atg ggc tac |     | 990bp             |   |
|                                 | A K Y L P           | G C C N R V L G I P H S S I M G Y                                   |     | 330aa             |   |
| exon 7/9 del                    | gcc aag tac ctg ccg |                                                                     |     | 939bp             |   |
|                                 | A K Y L P           |                                                                     |     | 313aa             |   |
| exon 9 del                      | gcc aag tac ctg ccg | ggg tgt tgt aac cga gtg ctg ggg att ccc cac agc tcc atc atg ggc tac |     | 990bp             |   |
|                                 | A K Y L P           | G C C N R V L G I P H S S I M G Y                                   |     | 330aa             |   |
| exon 8/9 del+170bp IVS7         | gcc aag tac ctg ccg | ggg tgt tgt aac cga gtg ctg ggg att ccc cac agc tcc atc atg ggc tac |     | 990bp             |   |
|                                 | A K Y L P           | G C C N R V L G I P H S S I M G Y                                   |     | 330aa             |   |
| exon 9 del+170 bp IVS7          | gcc aag tac ctg ccg | ggg tgt tgt aac cga gtg ctg ggg att ccc cac agc tcc atc atg ggc tac |     | 990bp             |   |
|                                 | A K Y L P           | G C C N R V L G I P H S S I M G Y                                   |     | 330aa             |   |
|                                 | ←                   | <b>RHD exon 6</b>                                                   | → ← | <b>RHD exon 7</b> | → |

|                                 |                                                                                         |        |
|---------------------------------|-----------------------------------------------------------------------------------------|--------|
| <i>RHD</i> wildtype (NM_016124) | aac ttc agc ttg ctg ggt ctg ctt gga gag atc atc tac att gtg ctg ctg gtg ctt gat acc gtc | 1056bp |
| RhD wildtype (NP_057208)        | N F S L L G L L G E I I Y I V L L V L D T V                                             | 352aa  |
| <i>RHD*1227A</i>                | aac ttc agc ttg ctg ggt ctg ctt gga gag atc atc tac att gtg ctg ctg gtg ctt gat acc gtc | 1056bp |
|                                 | N F S L L G L L G E I I Y I V L L V L D T V                                             | 352aa  |
| exon 7/8/9 del                  |                                                                                         | 939bp  |
|                                 |                                                                                         | 313aa  |
| exon 8/9 del                    | aac ttc agc ttg ctg ggt ctg ctt gga gag atc atc tac att gtg ctg ctg gtg ctt gat acc gtc | 1056bp |
|                                 | N F S L L G L L G E I I Y I V L L V L D T V                                             | 352aa  |
| exon 7/9 del                    |                                                                                         | 939bp  |
|                                 |                                                                                         | 313aa  |
| exon 9 del                      | aac ttc agc ttg ctg ggt ctg ctt gga gag atc atc tac att gtg ctg ctg gtg ctt gat acc gtc | 1056bp |
|                                 | N F S L L G L L G E I I Y I V L L V L D T V                                             | 352aa  |
| exon 8/9 del+170bp IVS7         | aac ttc agc ttg ctg ggt ctg ctt gga gag atc atc tac att gtg ctg ctg gtg ctt gat acc gtc | 1056bp |
|                                 | N F S L L G L L G E I I Y I V L L V L D T V                                             | 352aa  |
| exon 9 del+170 bp IVS7          | aac ttc agc ttg ctg ggt ctg ctt gga gag atc atc tac att gtg ctg ctg gtg ctt gat acc gtc | 1056bp |
|                                 | N F S L L G L L G E I I Y I V L L V L D T V                                             | 352aa  |

|                          |                                                                                                |                   |     |                     |   |
|--------------------------|------------------------------------------------------------------------------------------------|-------------------|-----|---------------------|---|
|                          | ←                                                                                              | <b>RHD exon 7</b> | →   |                     |   |
| RHD wildtype (NM_016124) | <b>gga gcc ggc aat ggc atg</b>                                                                 |                   |     | 1074bp              |   |
| RhD wildtype (NP_057208) | G A G N G M                                                                                    |                   |     | 358aa               |   |
| RHD*1227A                | <b>gga gcc ggc aat ggc atg</b>                                                                 |                   |     | 1074bp              |   |
|                          | G A G N G M                                                                                    |                   |     | 358aa               |   |
| exon 7/8/9 del           |                                                                                                |                   |     | 939bp               |   |
|                          |                                                                                                |                   |     | 313aa               |   |
| exon 8/9 del             | <b>gga gcc ggc aat ggc att</b>                                                                 |                   |     | 1074bp              |   |
|                          | G A G N G I                                                                                    |                   |     | 358aa               |   |
| exon 7/9 del             |                                                                                                |                   |     | 939bp               |   |
|                          |                                                                                                |                   |     | 313aa               |   |
| exon 9 del               | <b>gga gcc ggc aat ggc atg</b>                                                                 |                   |     | 1074bp              |   |
|                          | G A G N G M                                                                                    |                   |     | 358aa               |   |
| exon 8/9 del+170bp IVS7  | <b>gga gcc ggc aat ggc atg</b> tca ctc ggc tgg aac ctg gct gta aaa atg gct gaa gca ggt gat gag |                   |     | 1122bp              |   |
|                          | G A G N G M S L G W N L A V K M A E A G D E                                                    |                   |     | 374aa               |   |
| exon 9 del+170 bp IVS7   | <b>gga gcc ggc aat ggc atg</b> tca ctc ggc tgg aac ctg gct gta aaa atg gct gaa gca ggt gat gag |                   |     | 1122bp              |   |
|                          | G A G N G M S L G W N L A V K M A E A G D E                                                    |                   |     | 374aa               |   |
|                          | ←                                                                                              | <b>RHD exon 7</b> | → ← | <b>RHD intron 7</b> | → |
| <br>                     |                                                                                                |                   |     |                     |   |
| RHD wildtype (NM_016124) |                                                                                                |                   |     | 1074bp              |   |
| RhD wildtype (NP_057208) |                                                                                                |                   |     | 358aa               |   |
| RHD*1227A                |                                                                                                |                   |     | 1074bp              |   |
|                          |                                                                                                |                   |     | 358aa               |   |
| exon 7/8/9 del           |                                                                                                |                   |     | 939bp               |   |
|                          |                                                                                                |                   |     | 313aa               |   |
| exon 8/9 del             |                                                                                                |                   |     | 1074bp              |   |
|                          |                                                                                                |                   |     | 358aa               |   |
| exon 7/9 del             |                                                                                                |                   |     | 939bp               |   |
|                          |                                                                                                |                   |     | 313aa               |   |
| exon 9 del               |                                                                                                |                   |     | 1074bp              |   |
|                          |                                                                                                |                   |     | 358aa               |   |
| exon 8/9 del+170bp IVS7  | <b>gag ctg atg cgt ttg gac gtg tct cag aga aat cat gga ggc gct gcg gtt cct acc ggt tct tgg</b> |                   |     | 1188bp              |   |
|                          | E L M R L D V S Q R N H G G A A V P T G S W                                                    |                   |     | 396aa               |   |
| exon 9 del+170 bp IVS7   | <b>gag ctg atg cgt ttg gac gtg tct cag aga aat cat gga ggc gct gcg gtt cct acc ggt tct tgg</b> |                   |     | 1188bp              |   |
|                          | E L M R L D V S Q R N H G G A A V P T G S W                                                    |                   |     | 396aa               |   |

|                          |                                                                                         |                     |   |                       |
|--------------------------|-----------------------------------------------------------------------------------------|---------------------|---|-----------------------|
|                          | ←                                                                                       | <b>RHD intron 7</b> | → |                       |
| RHD wildtype (NM_016124) |                                                                                         |                     |   | att ggc ttc 1083bp    |
| RhD wildtype (NP_057208) |                                                                                         |                     |   | I G F 361aa           |
| RHD*1227A                |                                                                                         |                     |   | att ggc ttc 1083bp    |
|                          |                                                                                         |                     |   | I G F 361aa           |
| exon 7/8/9 del           |                                                                                         |                     |   | 939bp                 |
|                          |                                                                                         |                     |   | 313aa                 |
| exon 8/9 del             |                                                                                         |                     |   | 1074bp                |
|                          |                                                                                         |                     |   | 358aa                 |
| exon 7/9 del             |                                                                                         |                     |   | gat tgg ctt 948bp     |
|                          |                                                                                         |                     |   | D W L 316aa           |
| exon 9 del               |                                                                                         |                     |   | att ggc ttc 1083bp    |
|                          |                                                                                         |                     |   | I G F 361aa           |
| exon 8/9 del+170bp IVS7  | atg cct tct aca gag aca acc ata gcc cca aat tat agg gat cac ata tca gtg gtt             |                     |   | 1245bp                |
|                          | M P S T E T T I A P N Y R D H I S V V                                                   |                     |   | 415aa                 |
| exon 9 del+170 bp IVS7   | atg cct tct aca gag aca acc ata gcc cca aat tat agg gat cac ata tca gtg gga ttg gct tcc |                     |   | 1254bp                |
|                          | M P S T E T T I A P N Y R D H I S V G L A S                                             |                     |   | 418aa                 |
|                          | ←                                                                                       | <b>RHD intron 7</b> | → | ← <b>RHD exon 8</b> → |
| RHD wildtype (NM_016124) | cag gtc ctc ctc agc att ggg gaa ctc agc ttg gcc atc gtg ata gct ctc atg tct ggt ctc ctg |                     |   | 1149bp                |
| RhD wildtype (NP_057208) | Q V L L S I G E L S L A I V I A L M S G L L                                             |                     |   | 383aa                 |
| RHD*1227A                | cag gtc ctc ctc agc att ggg gaa ctc agc ttg gcc atc gtg ata gct ctc atg tct ggt ctc ctg |                     |   | 1149bp                |
|                          | Q V L L S I G E L S L A I V I A L M S G L L                                             |                     |   | 383aa                 |
| exon 7/8/9 del           |                                                                                         |                     |   | 939bp                 |
|                          |                                                                                         |                     |   | 313aa                 |
| exon 8/9 del             |                                                                                         |                     |   | 1074bp                |
|                          |                                                                                         |                     |   | 358aa                 |
| exon 7/9 del             | cca ggt cct cct cag cat tgg gga act cag ctt ggc cat cgt gat agc tct cat gtc tgg tct cct |                     |   | 1014bp                |
|                          | P G P P Q H W G T Q L G H R D S S H V W S P                                             |                     |   | 338aa                 |
| exon 9 del               | cag gtc ctc ctc agc att ggg gaa ctc agc ttg gcc atc gtg ata gct ctc atg tct ggt ctc ctg |                     |   | 1149bp                |
|                          | Q V L L S I G E L S L A I V I A L M S G L L                                             |                     |   | 383aa                 |
| exon 8/9 del+170bp IVS7  |                                                                                         |                     |   | 1245bp                |
|                          |                                                                                         |                     |   | 415aa                 |
| exon 9 del+170 bp IVS7   | agg tcc tcc tca gca ttg ggg aac tca gct tgg cca tog tga                                 |                     |   | 1296bp                |
|                          | R S S S A L G N S A W P S * (frame shift)                                               |                     |   | 431aa                 |



|                          |         |                                                                                     |   |                 |
|--------------------------|---------|-------------------------------------------------------------------------------------|---|-----------------|
|                          | ←       | <b>RHD exon 8</b>                                                                   | → |                 |
| RHD wildtype (NM_016124) | aca     | ggt ttg ctc cta aat ctt aaa ata tgg aaa gca cct cat gag gct aaa tat ttt gat gac caa |   | 1215bp          |
| RhD wildtype (NP_057208) | T       | G L L L N L K I W K A P H E A K Y F D D Q                                           |   | 405aa           |
| RHD*1227A                | aca     | ggt ttg ctc cta aat ctt aaa ata tgg aaa gca cct cat gag gct aaa tat ttt gat gac caa |   | 1215bp          |
|                          | T       | G L L L N L K I W K A P H E A K Y F D D Q                                           |   | 405aa           |
| exon 7/8/9 del           |         |                                                                                     |   | 939bp<br>313aa  |
| exon 8/9 del             |         |                                                                                     |   | 1074bp<br>358aa |
| exon 7/9 del             | gac agt |                                                                                     |   | 1020bp          |
|                          | D S     |                                                                                     |   | 340aa           |
| exon 9 del               | aca gtt |                                                                                     |   | 1155bp          |
|                          | T V     |                                                                                     |   | 385aa           |
| exon 8/9 del+170bp IVS7  |         |                                                                                     |   | 1245bp          |
| exon 9 del+170 bp IVS7   |         |                                                                                     |   | 415aa           |

←→|← **RHD exon 8** **RHD exon 9** →

|                          |                 |                                                                         |  |        |
|--------------------------|-----------------|-------------------------------------------------------------------------|--|--------|
|                          |                 | <b>RHD*1227A</b>                                                        |  |        |
| RHD wildtype (NM_016124) | gtt ttc tgg aag | ttt cct cat ttg gct gtt gga ttt taa                                     |  | 1254bp |
| RhD wildtype (NP_057208) | V F W K         | F P H L A V G F *                                                       |  | 417aa  |
| RHD*1227A                | gtt ttc tgg aaA | ttt cct cat ttg gct gtt gga ttt taa                                     |  | 1254bp |
|                          | V F W K         | F P H L A V G F *                                                       |  | 417aa  |
| exon 7/8/9 del           |                 | ttt cct cat ttg gct gtt gga ttt taa                                     |  | 966bp  |
|                          |                 | F P H L A V G F * (truncated)                                           |  | 321aa  |
| exon 8/9 del             |                 | ttc ctc att tgg ctg ttg gat ttt aag caa aag cat cca aga aaa aca agg cct |  | 1128bp |
|                          |                 | F L I W L L D F K Q K H P R K T R P                                     |  | 376aa  |
| exon 7/9 del             |                 | ttc ctc att tgg ctg ttg gat ttt aag caa aag cat cca aga aaa aca agg cct |  | 1074bp |
|                          |                 | F L I W L L D F K Q K H P R K T R P                                     |  | 358aa  |
| exon 9 del               |                 | tcc tca ttt ggc tgt tgg att tta agc aaa agc atc caa gaa aaa caa ggc ctg |  | 1209bp |
|                          |                 | S S F G C W I L S K S I Q E K Q G L                                     |  | 403aa  |
| exon 8/9 del+170bp IVS7  |                 | tcc tca ttt ggc tgt tgg att tta agc aaa agc atc caa gaa aaa caa ggc ctg |  | 1299bp |
|                          |                 | S S F G C W I L S K S I Q E K Q G L                                     |  | 433aa  |

← **RHD exon 9** →|← **RHD exon 10** →|← **RHD 3' untranslated regions** →

RHD wildtype (NM\_016124)  
RhD wildtype (NP\_057208)  
RHD\*1227A

exon 7/8/9 del

exon 8/9 del

exon 7/9 del

exon 9 del

exon 8/9 del+170bp IVS7

exon 9 del+170 bp IVS7

```

gtt caa aaa caa gac aac ttc ctc tca ctg ttg cct gca ttt gta cgt gag aaa cgc tca tga 1191bp
V Q K Q D N F L S L L P A F V R E K R S *(frame shift) 396aa
gtt caa aaa caa gac aac ttc ctc tca ctg ttg cct gca ttt gta cgt gag aaa cgc tca tga 1137bp
V Q K Q D N F L S L L P A F V R E K R S *(frame shift) 378aa
ttc aaa aac aag aca act tcc tct cac tgt tgc ctg cat ttg tac gtg aga aac gct cat gac agc 1275bp
F K N K T T S S H C C L H L Y V R N A H D S 425aa
ttc aaa aac aag aca act tcc tct cac tgt tgc ctg cat ttg tac gtg aga aac gct cat gac agc 1365bp
F K N K T T S S H C C L H L Y V R N A H D S 455aa

```

← **RHD 3' untranslated regions** →

RHD wildtype (NM\_016124)  
RhD wildtype (NP\_057208)  
RHD\*1227A

exon 7/8/9 del

exon 8/9 del

exon 7/9 del

exon 9 del

exon 8/9 del+170bp IVS7

exon 9 del+170 bp IVS7

```

aaa gtc tcc aat gtt cgc gca ggc act gga gtc aga gaa aat gga gtt gaa tcc ttt ctc tgc cac 1341
K V S N V R A G T G V R E N G V E S F L C H 447aa
aaa gtc tcc aat gtt cgc gca ggc act gga gtc aga gaa aat gga gtt gaa tcc ttt ctc tgc cac 1431
K V S N V R A G T G V R E N G V E S F L C H 477aa

```

← **RHD 3' untranslated regions** →

*RHD* wildtype (NM\_016124)  
 RhD wildtype (NP\_057208)  
*RHD*\*1227A

exon 7/8/9 del

exon 8/9 del

exon 7/9 del

exon 9 del

tct ttg agg aga atc tca cca ttt att atg cac tgt aga ata caa caa taa  
 S L R R I S P F I M H C R I Q Q \* (frame shift)

1392bp

exon 8/9 del+170bp IVS7

tct ttg agg aga atc tca cca ttt att atg cac tgt aga ata caa caa taa  
 S L R R I S P F I M H C R I Q Q \* (frame shift)

1482bp

exon 9 del+170 bp IVS7

← ***RHD* 3' untranslated regions** →

**Figure S8. Comparison of the nucleotide and deduced amino acids sequences of the major types of *RHD* variant transcripts identified in Asian-type DEL individuals**

Nucleic acid sequences of exon 1-5 were not shown since they are all identical. The nucleic acid sequences of exon 7, intron 7, exon 8, exon 9, exon 10 and 3' untranslated regions are highlighted in different colors. The full-length *RHD* transcript carrying the c.1227A variant (*RHD*\*1227A) was identified in Asian-type DEL individuals by nanopore sequencing, while other six previously reported *RHD* spliced transcripts, including exon 9 deletion (NM\_001282870), exon 8/9 deletion (NM\_001282869), exon 7/9 deletion (NM\_001282868), exon 7/8/9 deletion (NM\_001127691), exon 9 deletion with insertion of 170 bp of intron 7 (NM\_001282872), and exon 8/9 deletion with insertion of 170 bp of intron 7 (NM\_001282871), were also identified.

Comparison of the deduced amino acid sequences (listed as one-letter amino acid code) transcribed by the major *RHD* transcripts identified in Asian-type DEL individuals was also shown. The deduced amino acid sequences that were different from the wild-type sequences (NP\_057208) due to frameshift mutations are highlighted in red.

**Table S1. Results of *RHD* genotyping for 541 patients and 1036 Chinese pregnant women with DEL phenotype**

| Individuals with DEL phenotype | Number of samples | Frequency | <i>RHD</i> _Allele 1    | <i>RHD</i> _Allele 2          |
|--------------------------------|-------------------|-----------|-------------------------|-------------------------------|
| Patients<br>(n=541)            | 464               | 85.8%     | <i>RHD</i> *1227A       | -                             |
|                                | 50                | 9.2%      | <i>RHD</i> *1227A       | <i>RHD</i> *1227A             |
|                                | 12                | 2.2%      | <i>RHD</i> *1227A       | <i>RHD</i> *D-CE(2-9)-D       |
|                                | 3                 | 0.6%      | <i>RHD</i> *1227A       | <i>RHD</i> *711delC           |
|                                | 3                 | 0.6%      | <i>RHD</i> *1227A       | <i>RHD</i> *D-CE(2-10)        |
|                                | 1                 | 0.2%      | <i>RHD</i> *1227A       | <i>RHD</i> *CE(1-9)-D         |
|                                | 1                 | 0.2%      | <i>RHD</i> *1227A       | <i>RHD</i> *D-CE(2-7)-D       |
|                                | 1                 | 0.2%      | <i>RHD</i> *1227A       | <i>RHD</i> *D-CE(4-9)-D       |
|                                | 1                 | 0.2%      | <i>RHD</i> *1227A       | <i>RHD</i> *D-CE(4-7)-D       |
|                                | 1                 | 0.2%      | <i>RHD</i> *1227A       | <i>RHD</i> *421delG *         |
|                                | 1                 | 0.2%      | <i>RHD</i> *1227A       | <i>RHD</i> *IVS5+2G *         |
|                                | 1                 | 0.2%      | <i>RHD</i> *1227A       | <i>RHD</i> *1155C *           |
|                                | 1                 | 0.2%      | <i>RHD</i> *D-CE(4-7)-D | -                             |
|                                | 1                 | 0.2%      | <i>RHD</i> *222A *      | -                             |
| Pregnant women<br>(n=1,036)    | 863               | 83.1%     | <i>RHD</i> *1227A       | -                             |
|                                | 102               | 9.8%      | <i>RHD</i> *1227A       | <i>RHD</i> *1227A             |
|                                | 53                | 5.1%      | <i>RHD</i> *1227A       | <i>RHD</i> *D-CE(2-9)-D       |
|                                | 6                 | 0.6%      | <i>RHD</i> *1227A       | <i>RHD</i> *711delC           |
|                                | 2                 | 0.2%      | <i>RHD</i> *1227A       | <i>RHD</i> *D-CE(2-7)-D       |
|                                | 1                 | 0.1%      | <i>RHD</i> *1227A       | <i>RHD</i> *D-CE(2-10)        |
|                                | 4                 | 0.4%      | <i>RHD</i> *1227A       | <i>RHD</i> *CE(1-9)-D         |
|                                | 1                 | 0.1%      | <i>RHD</i> *1227A       | <i>RHD</i> *680_684delTGCTG * |
|                                | 1                 | 0.1%      | <i>RHD</i> *744T        | -                             |
|                                | 1                 | 0.1%      | <i>RHD</i> *1222C       | -                             |
|                                | 1                 | 0.1%      | <i>RHD</i> *761T *      | -                             |
|                                | 1                 | 0.1%      | <i>RHD</i> *1227delG *  | -                             |

\* Novel *RHD* alleles identified.

For the total of 1,571 Asian-type DEL pregnant women and patients identified, RhCE typing data showed that they were all positive for RhC antigen (Ccee, n = 1,210; CCee, n = 329; CcEe, n = 25; CCEe, n = 7).

**Table S2. Alloantibodies against RBCs antigens detected in the patients and pregnant women with true D– and Asian-type DEL phenotypes**

| Individuals with serological apparent D– phenotype * | true D– patients § |                      |         |             | Asian-type DEL patients § |         |  |
|------------------------------------------------------|--------------------|----------------------|---------|-------------|---------------------------|---------|--|
|                                                      | Numbers            | Alloantibodies       |         | Numbers     | Alloantibodies            |         |  |
|                                                      |                    | Types                | Numbers |             | Types                     | Numbers |  |
| Patients †<br>(n=2,011)                              | 1,470 (73.1%)      | Anti-D               | 63      | 539 (26.8%) | anti-Mi(a)                | 2       |  |
|                                                      |                    | Anti-D+anti-C        | 6       |             | Anti-E                    | 1       |  |
|                                                      |                    | Anti-Mi(a)           | 4       |             | Anti-M                    | 1       |  |
|                                                      |                    | Anti-D+anti-E        | 1       |             | anti-Jk <sup>a</sup>      | 1       |  |
|                                                      |                    | Anti-E               | 1       |             | anti-Chido/Rodgers        | 1       |  |
|                                                      |                    | Anti-M               | 1       |             | -                         | -       |  |
|                                                      |                    | anti-Jk <sup>a</sup> | 1       |             | -                         | -       |  |
| Total                                                |                    | 77                   |         | 6           |                           |         |  |

  

| Pregnant women<br>(n=4,045) | Pregnancy history ‡ | true D– pregnant women |                                | Asian-type DEL pregnant women |                |            |    |
|-----------------------------|---------------------|------------------------|--------------------------------|-------------------------------|----------------|------------|----|
|                             |                     | Numbers                | Alloantibodies                 | Numbers                       | Alloantibodies | Numbers    |    |
| Pregnant women<br>(n=4,045) | G1                  | 1,123                  | Anti-D                         | 4                             | 394            | UD         | UD |
|                             |                     |                        | Anti-D+anti-C                  | 1                             |                | UD         | UD |
|                             |                     |                        | Anti-M                         | 2                             |                | UD         | UD |
|                             | G2                  | 757                    | Anti-D                         | 20                            | 262            | Anti-M     | 1  |
|                             |                     |                        | Anti-D+anti-C                  | 2                             |                | UD         | UD |
|                             |                     |                        | Anti-M                         | 1                             |                | UD         | UD |
|                             | G3                  | 324                    | Anti-D                         | 7                             | 113            | UD         | UD |
|                             |                     |                        | Anti-D+anti-C                  | 5                             |                | UD         | UD |
|                             |                     |                        | Anti-Mi(a)                     | 1                             |                | UD         | UD |
|                             |                     |                        | Anti-cE + anti-Jk <sup>b</sup> | 1                             |                | UD         | UD |
|                             | G4                  | 121                    | Anti-D                         | 3                             | 43             | UD         | UD |
|                             |                     |                        | Anti-C                         | 1                             |                | UD         | UD |
|                             |                     |                        | Anti-E                         | 1                             |                | UD         | UD |
|                             | G5                  | 46                     | Anti-D                         | 3                             | 12             | UD         | UD |
|                             | G6                  | 8                      | Anti-D+anti-C                  | 1                             | 5              | UD         | UD |
|                             | G≥7                 | 5                      | UD                             | UD                            | 4              | UD         | UD |
|                             | unknown             | 625                    | Anti-D                         | 29                            | 199            | Anti-Mi(a) | 1  |

|       |               |               |    |  |                      |    |
|-------|---------------|---------------|----|--|----------------------|----|
|       |               | Anti-D+anti-E | 2  |  | Anti-Le <sup>a</sup> | 1  |
|       |               | Anti-D+anti-C | 2  |  | UD                   | UD |
|       |               | Anti-E        | 2  |  | UD                   | UD |
|       |               | Anti-M        | 1  |  | UD                   | UD |
| <hr/> |               |               |    |  |                      |    |
| Total | 3,009 (74.4%) |               | 89 |  | 1,032<br>(25.5%)     | 3  |

\* Among them, a total of 6 individuals, who did not produce alloantibodies against RBCs antigens, were identified with DEL phenotype carried *RHD* variant alleles except for Asian-type DEL allele.

† The patients are the inpatients applying for blood group testing before transfusions in the clinic.

‡ Only the gestational (G) time but no production (P) time was shown. For example, G5P0, G5P1, G5P2, G5P3, and G5P4, were all involved in the group of G5.

§ Before the trial, the difference in alloanti-D rate between the true D- and Asian-type DEL patient groups was statistically significant ( $P < 0.001$ ,  $\chi^2$  test, two sided).

**Table S3. Information of 54 Asian-type DEL recipients who received D+ RBC transfusion**

| Recipients | Age<br>(years) | Gender | Pregnancy<br>history | Diagnosis | Blood group typing                      |                   |               | Transfused<br>D+ RBCs<br>units † | Alloantibody test after<br>D+ RBCs transfusion |               | Effectiveness of<br>transfusion<br>(Hb changes) |                                                                               |
|------------|----------------|--------|----------------------|-----------|-----------------------------------------|-------------------|---------------|----------------------------------|------------------------------------------------|---------------|-------------------------------------------------|-------------------------------------------------------------------------------|
|            |                |        |                      |           | DEL<br>Serological<br>A/E testing       | RhCE<br>phenotype | RHD genotypes |                                  | Observation<br>time (days)<br>‡                | Results       |                                                 |                                                                               |
| 1          | DEL-18         | 76     | M                    | -         | Abdominal surgery                       | 2+                | Ccee          | <i>RHD*1227A</i>                 | 4U; 2U (2 days)                                | 28; 344       | Neg                                             | 4U: 141g/L→76g/L (Intraoperative blood loss 2000ml); 2U (2 days): 76g/L→87g/L |
| 2          | DEL-76         | 72     | M                    | -         | Coronary heart disease                  | 2+                | CCee          | <i>RHD*1227A/1227A</i>           | 2U                                             | 6; 192        | Neg                                             | 124g/L→128g/L (Intraoperative blood loss unknown) 106g/L→103g/L               |
| 3          | DEL-168        | 64     | F                    | G4P4      | Ovarian cancer                          | 2+                | Ccee          | <i>RHD*1227A</i>                 | 2U                                             | 167           | Neg                                             | (Intraoperative blood loss 500ml)                                             |
| 4          | DEL-177        | 30     | F                    | G5P5      | Hepatic metastasis of colonic carcinoma | 2+                | Ccee          | <i>RHD*1227A</i>                 | 4U                                             | 171           | Neg                                             | 62g/L→78g/L                                                                   |
| 5          | DEL-211        | 63     | M                    | -         | Liver cancer                            | 3+                | Ccee          | <i>RHD*1227A</i>                 | 4U; 2U (5 days)                                | 230           | Neg                                             | 4U: 75g/L→81g/L; 2U (5 days): 69g/L→78g/L                                     |
| 6          | DEL-230        | 52     | F                    | G2P2      | Uremia                                  | +                 | Ccee          | <i>RHD*1227A</i>                 | 1U                                             | 206; 224; 487 | Neg                                             | 55g/L→60g/L                                                                   |
| 7          | DEL-231        | 66     | M                    | -         | Lung cancer                             | +                 | Ccee          | <i>RHD*1227A</i>                 | 2U                                             | 222           | Neg                                             | 57g/L→83g/L                                                                   |

|    |         |          |   |      |                                 |    |      |           |                                              |                 |     |                                                                                            |
|----|---------|----------|---|------|---------------------------------|----|------|-----------|----------------------------------------------|-----------------|-----|--------------------------------------------------------------------------------------------|
| 8  | DEL-234 | 105 days | M | -    | Extremely premature infant      | +  | Ccee | RHD*1227A | 0.5U                                         | 693             | Neg | 96g/L→92g/L<br>(Blood loss unknown)                                                        |
| 9  | DEL-265 | 49       | M | -    | Liver cancer                    | 2+ | Ccee | RHD*1227A | 4U; 4U (22 days); 2U (23 days); 2U (24 days) | 26; 27; 28; 257 | Neg | 4U: 124g/L→133g/L<br>4U (22 days), 2U (23 days): 62g/L→79g/L<br>2U (24 days): 86g/L→122g/L |
| 10 | DEL-368 | 55       | M | -    | Upper gastrointestinal bleeding | 3+ | Ccee | RHD*1227A | 2U; 3.5U (372 days); 2U (373 days)           | 209; 386        | Neg | 2U: 64g/L→80g/L<br>3.5U (372 days): 35g/L→48g/L<br>2U (373 days): 48g/L→65g/L              |
| 11 | DEL-469 | 76       | M | -    | Upper gastrointestinal bleeding | 3+ | Ccee | RHD*1227A | 2U                                           | 165             | Neg | ND **                                                                                      |
| 12 | DEL-522 | 18       | M | -    | Scoliosis                       | 2+ | Ccee | RHD*1227A | 8U                                           | 184; 281        | Neg | 152g/L→138g/L<br>(Intraoperative blood loss unknown)                                       |
| 13 | DEL-527 | 46       | F | G2P2 | Gastric carcinoma               | 1+ | Ccee | RHD*1227A | 4U; 4U (6 days)                              | 92              | Neg | 4U: 76g/L→97g/L;<br>4U (6 days): 97g/L→111g/L<br>(Intraoperative blood loss 100ml)         |
| 14 | DEL-572 | 52       | F | G2P2 | Humeral fractures               | 2+ | Ccee | RHD*1227A | 2U                                           | 195             | Neg | 93g/L→104g/L<br>(Intraoperative                                                            |



|    |         |    |   |   |                           |    |      |           |                                                                                                         |                  |     |                                                                                                                                                                        |                       |
|----|---------|----|---|---|---------------------------|----|------|-----------|---------------------------------------------------------------------------------------------------------|------------------|-----|------------------------------------------------------------------------------------------------------------------------------------------------------------------------|-----------------------|
|    |         |    |   |   |                           |    |      |           |                                                                                                         |                  |     |                                                                                                                                                                        | blood loss<br>unkown) |
| 15 | DEL-574 | 54 | M | - | Femoral fracture          | 2+ | Ccee | RHD*1227A | 2U; 4U (5 days); 2U (5 days)                                                                            | 57               | Neg | 2U: 63g/L→69g/L;<br>2U (5 days): 73g/L→63g/L<br>(Intraoperative blood loss 400ml)                                                                                      |                       |
| 16 | DEL-628 | 4  | M | - | Neuroblastic tumor        | 3+ | Ccee | RHD*1227A | 2U; 1U (21 days); 2U (35 days); 1U (59 days); 2U (66 days); 2U (247 days); 2U (254 days); 2U (282 days) | 19; 63; 244; 289 | Neg | 2U: 54g/L→90g/L;<br>1U (21 days): 57g/L→69g/L;<br>2U (35 days): 61g/L→93g/L;<br>1U (59 days): 44g/L→63g/L;<br>2U (66 days): 57g/L→95g/L;<br>2U (247 days): 24g/L→58g/L |                       |
| 17 | DEL-629 | 28 | M | - | Gastrointestinal bleeding | 3+ | Ccee | RHD*1227A | 4U; 4U (86 days); 4U (89 days)                                                                          | 84; 444          | Neg | 4U: 71g/L→104g/L;<br>4U (86 days): 59g/L→94g/L;<br>4U (89 days): 95g/L→108g/L                                                                                          |                       |
| 18 | DEL-630 | 49 | M | - | Femoral head necrosis     | 3+ | Ccee | RHD*1227A | 4U                                                                                                      | 152              | Neg | 147g/L→150g/L<br>(Intraoperative blood loss 600ml)                                                                                                                     |                       |

|    |         |    |   |      |                                             |    |      |                       |                                                                                                                                                                                                                                                         |                  |     |                                                          |
|----|---------|----|---|------|---------------------------------------------|----|------|-----------------------|---------------------------------------------------------------------------------------------------------------------------------------------------------------------------------------------------------------------------------------------------------|------------------|-----|----------------------------------------------------------|
| 19 | DEL-633 | 49 | M | -    | Subarachnoid hemorrhage                     | 3+ | CCee | RHD*1227A/D-CE(2-9)-D | 2U                                                                                                                                                                                                                                                      | 302              | Neg | 128g/L→111g/L<br>(Intraoperative blood loss 400ml)       |
| 20 | DEL-679 | 13 | M | -    | Neuroblastoma                               | 2+ | Ccee | RHD*1227A             | 1U; 2U (6 days); 2U (24 days); 2U (31 days); 2U (46 days); 1U (818 days); 1U (840 days); 1U (1168 days); 2U (1176 days); 2U (1187 days); 2U (1196 days); 2U (1207 days); 2U (1245 days); 2U (1256 days); 1U (1345 days); 1U (1346 days); 2U (1355 days) | 1168; 1345; 1354 | Neg | 2U (31 days): 53g/L→81g/L<br>1U (1168 days): 43g/L→51g/L |
| 21 | DEL-797 | 50 | F | G4P2 | Abnormal uterine bleeding;<br>Severe anemia | 3+ | Ccee | RHD*1227A             | 2U                                                                                                                                                                                                                                                      | 179              | Neg | 59g/L→85g/L                                              |
| 22 | DEL-872 | 37 | M | -    | Chronic renal failure; Anemia               | 3+ | Ccee | RHD*1227A             | 2U; 2U (2 day); 2U (3 days); 2U (4 days); 2U (5 days); 2U (6 days)                                                                                                                                                                                      | 1;2;3;4;5; 449   | Neg | 2U; 2U (2 day); 2U (3 days): 49g/L→64g/L                 |

|    |          |    |   |      |                          |    |      |                       |                                |                          |     |                                                                |
|----|----------|----|---|------|--------------------------|----|------|-----------------------|--------------------------------|--------------------------|-----|----------------------------------------------------------------|
| 23 | DEL-890  | 78 | M | -    | Chronic anemia           | 3+ | CCee | RHD*1227A/1227A       | 2U; 2U (63 days); 2U (73 days) | 61; 70; 192              | Neg | ND **                                                          |
| 24 | DEL-909  | 44 | M | -    | Heart valvular disease   | 2+ | Ccee | RHD*1227A             | 2U                             | 104                      | Neg | 111g/L→105g/L (Intraoperative blood loss unkown)               |
| 25 | DEL-989  | 53 | F | G3P3 | Meningioma               | 3+ | Ccee | RHD*1227A             | 2U                             | 397                      | Neg | ND **                                                          |
| 26 | DEL-994  | 26 | M | -    | Pituitary adenoma        | 2+ | Ccee | RHD*1227A             | 2U                             | 43                       | Neg | ND **                                                          |
| 27 | DEL-1025 | 49 | F | G2P2 | Gallstone                | 3+ | CCee | RHD*1227A             | 4U                             | 32                       | Neg | 92g/L→106g/L                                                   |
| 28 | DEL-1091 | 66 | M | -    | Rectal cancer            | 2+ | Ccee | RHD*1227A             | 4U                             | 332                      | Neg | 60g/L→81g/L (Intraoperative blood loss 50ml)                   |
| 29 | DEL-1117 | 86 | M | -    | Rectal cancer            | 3+ | CCee | RHD*1227A/1227A       | 2U                             | 831                      | Neg | ND **                                                          |
| 30 | DEL-1268 | 80 | M | -    | Tumor with severe anemia | 3+ | CCee | RHD*1227A/D-CE(2-9)-D | 2U; 2U (4 days); 4U (696 days) | 4; 14; 27; 155; 695; 704 | Neg | 4U (696 days): 58g/L→92g/L                                     |
| 31 | DEL-1324 | 75 | F |      | Femoral neck fracture    | 3+ | Ccee | RHD*1227A             | 2U; 2U (3 days)                | 3, 86                    | Neg | 2U, 2U (3 days): 91g/L→81g/L (Intraoperative blood loss 200ml) |
| 32 | DEL-1329 | 40 | M | -    | Lung cancer              | 3+ | Ccee | RHD*1227A             | 6U                             | 69                       | Neg | 112g/L→119g/L (Intraoperative blood loss unkown)               |
| 33 | DEL-1401 | 70 | M | -    | Lumbar spinal stenosis   | 3+ | Ccee | RHD*1227A             | 2U                             | 803                      | Neg | ND **                                                          |

|    |          |    |   |      |                                   |    |      |           |                                                           |              |     |                                                                                                                                |
|----|----------|----|---|------|-----------------------------------|----|------|-----------|-----------------------------------------------------------|--------------|-----|--------------------------------------------------------------------------------------------------------------------------------|
| 34 | DEL-1420 | 62 | M | -    | Gastrorrhagia                     | 3+ | Ccee | RHD*1227A | 2U; 2U (2 days); 1.5U (5 days)                            | 1; 2; 5; 556 | Neg | 2U: 59g/L→68g/L;<br>2U (2 days): 68g/L→76g/L;<br>1.5U (5 days): 67g/L→75g/L                                                    |
| 35 | DEL-1436 | 47 | F | G1P1 | Lung cancer with brain metastasis | 2+ | Ccee | RHD*1227A | 4U; 4U (24 days); 4U (114 days)                           | 24; 114      | Neg | 4U: 62g/L→86g/L;<br>4U (24 days): 78g/L→104g/L;<br>4U (114 days): 68g/L→118g/L                                                 |
| 36 | DEL-1487 | 72 | M | -    | Kidney neoplasms                  | 3+ | CCee |           | 2U                                                        | 506          | Neg | 114g/L→125g/L                                                                                                                  |
| 37 | DEL-1659 | 6  | M | -    | Neuroblastoma                     |    | Ccee | RHD*1227A | 1U; 1U (7 days); 2U (8 days); 2U (41 days); 1 U (83 days) | 7; 8; 41; 83 | Neg | 1U: 55g/L→81g/L;<br>1U (7 days): 33g/L→31g/L;<br>2U (41 days): 44g/L→70g/L<br>91g/L→85g/L<br>(Intraoperative blood loss 400ml) |
| 38 | DEL-1720 | 78 | M | -    | Fracture                          | 3+ | Ccee | RHD*1227A | 4U                                                        | 2; 6; 260    | Neg |                                                                                                                                |
| 39 | DEL-1900 | 62 | M | -    | Severe pneumonia                  | 3+ | Ccee | RHD*1227A | 2U                                                        | 10; 329      | Neg | 69g/L→81g/L                                                                                                                    |

|    |          |    |   |      |                  |      |      |           |                                                                                      |                            |            |                                                                                                                                                                                                                                |
|----|----------|----|---|------|------------------|------|------|-----------|--------------------------------------------------------------------------------------|----------------------------|------------|--------------------------------------------------------------------------------------------------------------------------------------------------------------------------------------------------------------------------------|
| 40 | DEL-1960 | 49 | F | -    | Evans syndrome   | ND * | Ccee | RHD*1227A | 2U; 2U (2 days); 2U (3 days); 2U (9 days); 4U (17 days); 2U (27 days); 2U (130 days) | 1; 8; 15; 26; 37; 129; 133 | Anti-Mi(a) | 2U: 50g/L→59g/L<br>2U (2 days): 59g/L→64g/L<br>2U (3 days): 64g/L→65g/L (Intraoperative blood loss unknwn)<br>2U (9 days): 61g/L→65g/L<br>4U (17 days): 48g/L→73g/L<br>2U (27 days): 56g/L→58g/L<br>2U (130 days): 63g/L→69g/L |
| 41 | DEL-1982 | 67 | M | -    | Gangrene; Anemia | 3+   | Ccee | RHD*1227A | 2U; 2U (84 days); 2U (85 days); 4U (96 days); 4U (102 days)                          | 83; 95; 101                | Neg        | 2U (84 days): 75g/L→94g/L                                                                                                                                                                                                      |
| 42 | DEL-2159 | 58 | F | G2P2 | Ovarian cancer   | 3+   | Ccee | RHD*1227A | 2U; 2U (1 day); 4U (5 days); 1.5U (89 days); 1U (93 days)                            | 5; 40; 88; 92              | Neg        | 2U: 45g/L→60g/L<br>2U (1 day): 60g/L→75g/L<br>4U (5 days): 80g/L→100g/L                                                                                                                                                        |
| 43 | DEL-114  | 64 | F | G0P0 | Cardiosurgery    | ND*  | Ccee | RHD*1227A | 2U; 4U (6 days)                                                                      | 7 §                        | Neg        | 2U: 70g/L→83g/L;<br>4U (6 days): 76g/L→99g/L                                                                                                                                                                                   |

|    |          |    |   |      |                            |      |      |                       |                                 |          |      |                                                                                         |
|----|----------|----|---|------|----------------------------|------|------|-----------------------|---------------------------------|----------|------|-----------------------------------------------------------------------------------------|
| 44 | DEL-792  | 62 | F | G3P3 | Liver cancer;<br>Hemobilia | 2+   | Ccee | RHD*1227A             | 2U; 8U (13 days)                | 12 §     | Neg  | 2U: 60g/L→<br>74g/L                                                                     |
| 45 | DEL-1074 | 36 | M | -    | Heart failure              | 3+   | Ccee | RHD*1227A             | 2U; 2U (12 days); 2U (14 days); | 12; 14 § | Neg  | 2U: 57g/L→<br>73g/L;<br>2U: (12 days):<br>49g/L→50g/L;<br>2U: (14 days):<br>40g/L→41g/L |
| 46 | DEL-1906 | 54 | F | -    | Spinal malignancy          | 3+   | Ccee | RHD*1227A             | 10U                             | 19 §     | Neg  | 127g/L→94g/L<br>(Intraoperative blood loss 900ml)                                       |
| 47 | DEL-86   | 61 | F | ND   | Lupus nephritis            | 2+   | CcEe | RHD*1227A/421delG     | 4U                              |          | ND § |                                                                                         |
| 48 | DEL-113  | 86 | M | -    | Hemorrhagic shock          | ND * | Ccee | RHD*1227A             | 2U                              |          | ND   |                                                                                         |
| 49 | DEL-259  | 81 | F | ND   | Bone fistula               | +    | CCee | RHD*1227A             | 4U                              |          | ND § |                                                                                         |
| 50 | DEL-315  | 91 | F | ND   | Fracture                   | 2+   | CCee | RHD*1227A/D-CE(2-8)-D | 4U                              |          | ND ¶ |                                                                                         |
| 51 | DEL-343  | 60 | F | G5P5 | Cervical cancer            | 2+   | CCee | RHD*1227A             | 2U                              |          | ND   |                                                                                         |
| 52 | DEL-472  | 47 | F | ND   | Anemia                     | 3+   | Ccee | RHD*1227A             | 4U                              |          | ND ¶ |                                                                                         |
| 53 | DEL-662  | 88 | M | -    | Gastrointestinal bleeding  | 3+   | Ccee | RHD*1227A             | 2U                              |          | ND ¶ |                                                                                         |
| 54 | DEL-1665 | 49 | M | -    | Gastrointestinal bleeding  | 2+   | Ccee | RHD*1227A             | 4U                              |          | ND § |                                                                                         |

\* Adsorption and elution testing was not conducted because of positive DAT (3+) identified in the patients.

† In the bracket, the days for the next time of D+ blood transfusion were counted from the first day to receive D+ blood transfusion.

‡ The exact days were counted from the first day to receive D+ blood transfusion.

§ No further sample was available for follow-up antibody screening as the patient passed away.

|| The follow-up data after D+ blood transfusion was not available for noncooperative recipients.

¶ The patients were out of touch for follow-up.

\*\* Improvement of anemia symptoms was observed.

Abbreviation: A/E testing: Adsorption/elution testing; Neg: Negative results for antibody screening after receiving D+ blood transfusion; ND: Not detected.

**Table S4. The total reads and mapping rate of Nanopore sequencing to *RHD* transcripts in eight Asian-type DEL individuals and one D+ control**

| Sample ID  | <i>RHD</i> genotypes     | Total Reads | Mapped Reads | Mapping rate |
|------------|--------------------------|-------------|--------------|--------------|
| G707       | <i>RHD</i> *1227A/1227A  | 245790      | 240085       | 97.68%       |
| G927       | <i>RHD</i> *1227A/01N.01 | 213241      | 208556       | 97.80%       |
| G1191      | <i>RHD</i> *1227A/1227A  | 223884      | 215382       | 96.20%       |
| G1493      | <i>RHD</i> *1227A/01N.01 | 285986      | 274253       | 95.90%       |
| G2076      | <i>RHD</i> *1227A/1227A  | 3591741     | 3550457      | 98.85%       |
| G2245      | <i>RHD</i> *1227A/1227A  | 217099      | 212156       | 97.72%       |
| G2839      | <i>RHD</i> *1227A/01N.01 | 260482      | 256434       | 98.45%       |
| G3068      | <i>RHD</i> *1227A/01N.01 | 238167      | 232314       | 97.54%       |
| D+ control | <i>RHD</i> *01/01        | 107561      | 105769       | 98.33%       |



## SUPPLEMENTARY REFERENCES

1. Gu J, Sun AY, Wang XD, et al. Analysis of density and epitopes of D antigen on the surface of erythrocytes from DEL phenotypic individuals carrying the RHD1227A allele. *Blood Transfus.* 2014;12(2):244-249.
2. Li Q, Hou L, Guo ZH, et al. Molecular basis of the RHD gene in blood donors with DEL phenotypes in Shanghai. *Vox Sang.* 2009;97(2):139-146.
3. Shao CP, Maas JH, Su YQ, et al. Molecular background of Rh D-positive, D-negative, D(el) and weak D phenotypes in Chinese. *Vox Sang.* 2002;83(2):156-161.
4. Haer-Wigman L, Veldhuisen B, Jonkers R, et al. *RHD* and *RHCE* variant and zygosity genotyping via multiplex ligation-dependent probe amplification. *Transfusion.* 2013;53(7):1559-1574.
5. Ji YL, Luo H, Wen JZ, et al. *RHD* genotype and zygosity analysis in the Chinese Southern Han D+, D- and D variant donors using the multiplex ligation-dependent probe amplification assay. *Vox Sang.* 2017;112(7):660-670.
6. Chen DP, Sun CF, Ning HC, et al. Comprehensive analysis of RHD splicing transcripts reveals the molecular basis for the weak anti-D reactivity of Del -red blood cells. *Transfus Med.* 2016;26(2):123-129.
7. Li H. Minimap2: pairwise alignment for nucleotide sequences. *Bioinformatics.* 2018;34(18):3094-3100.
8. Tang AD, Soulette CM, van Baren MJ, et al. Full-length transcript characterization of SF3B1 mutation in chronic lymphocytic leukemia reveals downregulation of retained introns. *Nat Commun.* 2020;11(1):1438.
